# Different Involvement of Promoter Methylation in the Expression of Organic Cation/Carnitine Transporter 2 (OCTN2) in Cancer Cell Lines

Qiang Qu<sup>1</sup>, Jian Qu<sup>1</sup>, Min Zhan<sup>1</sup>, Lan-Xiang Wu<sup>2</sup>, Yi-Wen Zhang<sup>1</sup>, Xiao-Ya Lou<sup>1</sup>, Li-Juan Fu<sup>2</sup>, Hong-Hao Zhou<sup>1\*</sup>

<sup>1</sup> Institute of Clinical Pharmacology, Hunan Key Laboratory of Pharmacogenetics, Xiangya School of Medicine, Central South University, Changsha, Hunan, China,

<sup>2</sup> Institute of Life Sciences, Chongqing Medical University, Chongqing, China

## Abstract

Organic cation/carnitine transporter 2 (OCTN2) is responsible for the cellular uptake of the antineoplastic agent, oxaliplatin. Epigenetic modification is a possible mechanism of altered drug-transporter expression in cancers, leading to altered efficacy of chemotherapeutic drugs. However, the mechanisms governing OCTN2 regulation are not completely understood. In this study, the low levels of OCTN2 in HepG2 and LS174T cells were elevated by the demethylating reagent, decitabine (DCA). To further reveal the epigenetic mechanism of down-regulation of OCTN2, we found that Region-1 within the *OCTN2* promoter (spanning -354 to +85) was a determinant of OCTN2 expression in a luciferase reporter assay. Moreover, methylation-specific PCR (MSP) and bisulfite genomic sequencing showed that the degree of individual methylated CpG sites within this region was inversely correlated with the levels of OCTN2 in different cancer cells. Application of DCA to HepG2 and LS174T cells reversed the hypermethylation status of the *OCTN2* promoter and increased OCTN2 expression, enhancing cellular uptake of oxaliplatin. Thus, we identified that promoter methylation is responsible for epigenetic down-regulation of OCTN2 in HepG2 and LS174T cells. Given the essential role of OCTN2 in cancer cell uptake of chemotherapeutics, and thus treatment efficacy, pretreatment with a demethylating reagent is a possible strategy for optimizing pharmacotherapies against cancers.

**Citation:** Qu Q, Qu J, Zhan M, Wu L-X, Zhang Y-W, et al. (2013) Different Involvement of Promoter Methylation in the Expression of Organic Cation/Carnitine Transporter 2 (OCTN2) in Cancer Cell Lines. PLoS ONE 8(10): e76474. doi:10.1371/journal.pone.0076474

**Editor:** Suresh Yenugu, University of Hyderabad, India

**Received:** July 16, 2013; **Accepted:** August 29, 2013; **Published:** October 16, 2013

**Copyright:** © 2013 Qu et al. This is an open-access article distributed under the terms of the Creative Commons Attribution License, which permits unrestricted use, distribution, and reproduction in any medium, provided the original author and source are credited.

**Funding:** This work was supported by the State Scholarship Fund from China Scholarship Council (File No. 201206370103), the National Scientific Foundation of China (No. 81273595, 81072706), the Scientific Foundation of Hunan (No. 11K073, 10JJ4020), the “863” Project (No. 2012AA02A518), NCET-10-0843 and Research Innovation Foundation of Graduate Student in Hunan province, P.R.C (CX2011B056). The funders had no role in study design, data collection and analysis, decision to publish, or preparation of the manuscript.

**Competing Interests:** The authors have declared that no competing interests exist.

\* E-mail: hhzhou2003@163.com

## Introduction

The human *SLC22A5* gene, which encodes a 63 kDa organic cation/carnitine transporter 2 (OCTN2), is located in the cytokine cluster region on chromosome 5q31 [1,2]. OCTN2 is expressed in various tissues, including kidney, skeletal muscle, heart, colon, brain, liver, etc [3]. Functional defects of OCTN2 are associated with various diseases including primary carnitine deficiency, Crohn's disease, and asthma [4–8]. OCTN2 not only transports carnitine, but also recognizes clinically important therapeutics such as mildronate, verapamil, pyrilamine, oxaliplatin, imatinib and cephaloridine [9–13]. OCTN2 is associated with oxaliplatin accumulation and cytotoxicity in OCTN2-HEK293 transfected cells [11]. The two alleles of *OCTN2* (rs2631367 and rs2631372) may be important predictors in gastrointestinal stromal tumor patients receiving imatinib therapy [12]. These reports indicate that the functional defects and/or aberrant expression of OCTN2 may affect the disposition and subsequent therapeutic efficacy of its substrates.

Several reports suggest the involvement of peroxisome proliferator-activated receptor alpha (PPARA) and gamma (PPARG) in the transcriptional regulation of OCTN2 in various tissues.

However, down-regulation of OCTN2 has been reported in tumors with high expression of PPARA and PPARG [14–16]. A recent study found that the decreased levels of OCTN2 in several epithelial cancer cell lines could be restored by the demethylating reagent 5-aza-cytidine [17]. These findings imply that other machineries cooperate with the transcription factor network to modulate the expression of OCTN2, such as DNA methylation.

DNA methylation is an important epigenetic mechanism that modulates gene expression. The CpG dinucleotide near transcriptional start sites is abundant in gene promoters, and is referred to as CpG islands. The methylation of CpG islands is associated with repressed gene transcription and abnormal DNA methylation can lead to aberrant gene expression. Unlike gene mutation, DNA methylation can be reversibly altered by demethylating agents such as decitabine (5-aza-2'-deoxycytidine, DCA) and 5-aza-cytidine. These agents are incorporated into the DNA and inactivate DNA cytosine C5-methyltransferases [18]. Thus, we hypothesized that the differential methylation status of *OCTN2* may be correlated with the aberrant expression of OCTN2 in cancer cells.

In this study, we investigated whether the methylation of CpG islands acts as a possible mechanism responsible for the down-regulation of OCTN2 in cancer cell lines. By using methylation-specific PCR (MSP), bisulfite genomic sequencing, and *in vitro* methylation assays, we have provided evidence that promoter DNA methylation is an essential mechanism suppressing OCTN2 expression in cancer cell lines. Application of a demethylating reagent, which modulated the methylation status of the *OCTN2* promoter, increased the expression of OCTN2 and made cancer cells more sensitive to oxaliplatin.

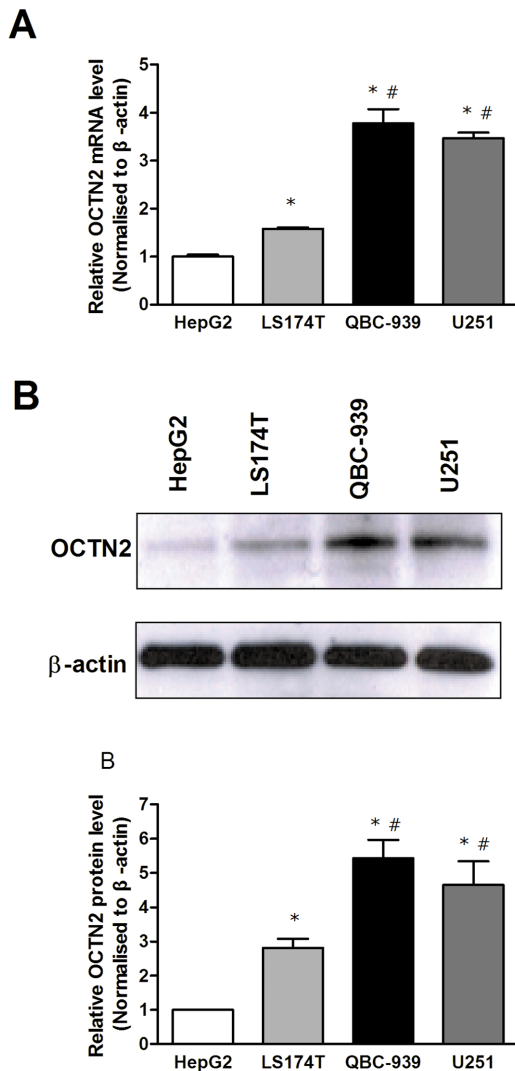

**Figure 1. Expression of OCTN2 in cancer cell lines.** (A), analysis of mRNA levels of OCTN2 in cancer cell lines. Total RNA in cancer cells was purified by TRIzol reagent for cDNA synthesis and the mRNA levels of OCTN2 were analyzed by Quantitative RT-PCR. (B), analysis of protein levels of OCTN2 in cancer cells. Total proteins were extracted and protein levels of OCTN2 were analyzed by western blotting. The relative expression of mRNA and protein was normalized to  $\beta$ -actin. The expression of HepG2 was set as 1. All of mRNA and protein analysis were performed three times. Significant difference from HepG2 or LS174T cell is denoted with asterisk (\*,  $p < 0.05$ ) or number sign (#,  $p < 0.05$ ), respectively. doi:10.1371/journal.pone.0076474.g001

## Materials and Methods

### Chemicals and Reagents

Decitabine, sodium bisulfate, hydroquinone and oxaliplatin were purchased from Sigma-Aldrich (St. Louis, MO). TRIzol reagent and Lipofectamine 2000 were obtained from Invitrogen (Carlsbad, CA).

### Cell Culture and Treatment with DCA

The hepatoma cell line HepG2, colon cancer cell line LS174T, glioma cell line U251, bile duct cancer cell line QBC-939 and African green monkey kidney cell line COS-7 were obtained from American Type Culture Collection (Manassas, VA). Cell lines were cultured in DMEM supplemented with 10% fetal bovine serum (FBS) at 37°C in a humidified incubator containing 5% CO<sub>2</sub>, except the QBC-939 cell line, which was cultured in RPMI 1640. Cells were treated with DCA at a final concentration of 0.5  $\mu$ M or 1  $\mu$ M and renewed every 24 h for one week.

### RNA purification, cDNA Synthesis and Quantitative Real-time PCR

Total cellular RNA was isolated from the treated cells using TRIzol reagent. cDNA was synthesized from 1  $\mu$ g of total RNA using the first cDNA synthesis kit (Takara, Dalian). Quantitative RT-PCR was performed using SYBR Green (Bio-rad) and the primers are listed in Table S1. RT-PCR was performed over 40 cycles at 95°C for 30 s, at 60°C for 30 s, and 72°C for 30 s followed by a final extension at 72°C for 2 min. The relative mRNA expression was normalized to the housekeeping gene  $\beta$ -actin and the analysis was carried out using the  $2^{-\Delta\Delta C_t}$  method [19].

### Western Blotting

Total cellular proteins were extracted and the concentrations were quantified by the BCA protein assay (Thermo Scientific, Rockford, IL). Proteins were subjected to SDS-polyacrylamide gel electrophoresis on 10% polyacrylamide gels and transferred to PVDF membrane. The membrane was probed with either an anti-rabbit OCTN2 antibody (1:400, Abcam Labs, Cambridge, MA) or  $\beta$ -actin antibody (1:1000, Abcam Labs). Subsequently, membranes were incubated with DyLight 800-labeled rabbit polyclonal antibody (1:7500, KPL Inc, Gaithersburg, MD), protected from the light. The stained membranes were scanned by Odyssey Infrared Imaging System (LI-COR Biosciences). The ratios of OCTN2 against  $\beta$ -actin were calculated.

### Cell Viability Assay

Cancer cell lines were treated with 1  $\mu$ M DCA or 0.1% DMSO for one week. Subsequently, cells were seeded into 96-well plates at a density of  $2 \times 10^4$ /well, and exposed to oxaliplatin at various concentrations (0, 0.3, 1, 3, 10, 33, 100 or 330  $\mu$ M) for 48 h. Cell viability was measured by the MTS assay (Promega, Madison, WI) and IC<sub>50</sub> values were calculated using SPSS 13.0 version.

### Methylation-Specific PCR (MSP) and Bisulfite-Sequencing PCR (BSP)

To predict regions rich in CpG dinucleotides close to the *OCTN2* transcriptional start site, we used Methyl-Primer software (<http://www.urogene.org/methprimer/>) according to the following criteria: the length of CpG island >100 bp, observed/expected CpG ratio >0.6 and percentage of G plus C >50%. We searched the *OCTN2* genomic sequence including 1.5 kb

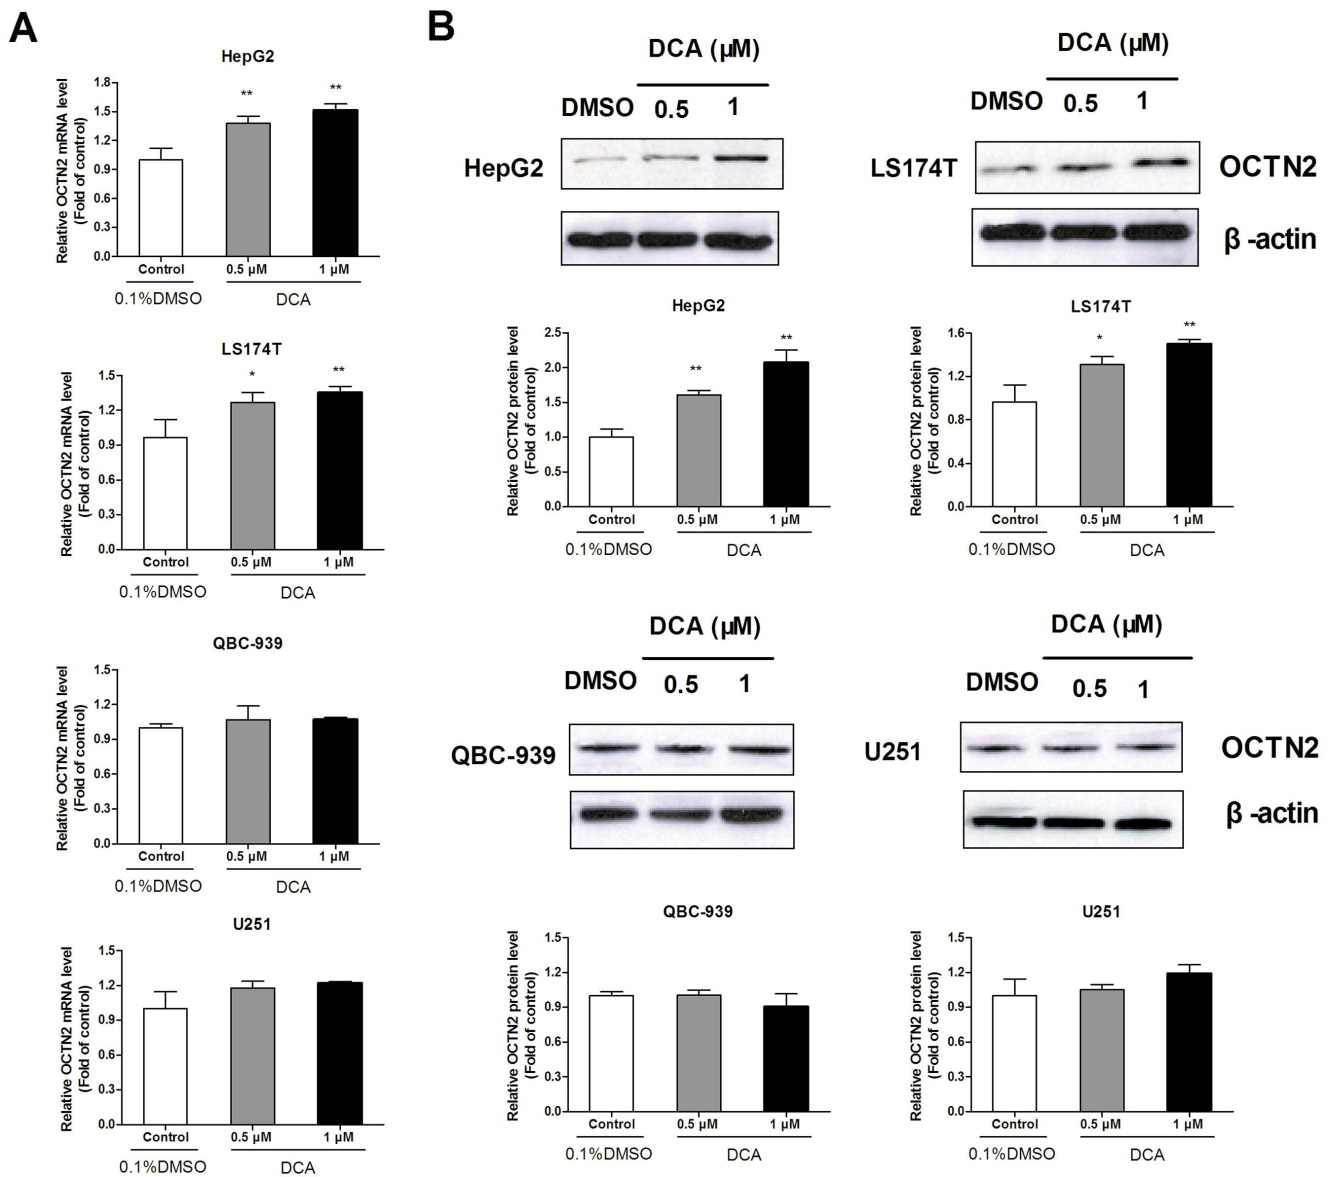

**Figure 2. Effects of DCA on mRNA and protein levels of OCTN2 in cancer cell lines.** (A), analysis of mRNA levels of OCTN2 in DCA-treated cancer cell lines. After treatment with 0.5 and 1  $\mu$ M DCA, total RNA in cancer cells was purified by TRIzol reagent for cDNA synthesis and the mRNA levels of OCTN2 were analyzed by Quantitative RT-PCR. (B), analysis of protein levels of OCTN2 in DCA-treated cancer cell lines. Total proteins were extracted and protein levels of OCTN2 were analyzed by western blotting. The relative expression of mRNA and protein was normalized to  $\beta$ -actin. Data presented represent the mean  $\pm$  S.D. of three independent experiments. Significant difference from control group of 0.1% DMSO is denoted with asterisks (\*,  $p < 0.05$ ; \*\*,  $p < 0.01$ ). doi:10.1371/journal.pone.0076474.g002

upstream and 2 kb downstream of transcriptional start site (TSS). According to the predicted CpG islands, MSP and BSP primers were designed and are listed in Table S1. Genomic DNA of cancer cell lines was isolated and DNA bisulfite modification was performed as described [20]. Bisulfite modified DNA was recovered by Wizard DNA Clean Up System (Promega) and treated with 5.5  $\mu$ l of NaOH then precipitated with ethanol. Precipitated DNA was re-suspended in water, and then amplified with MSP or BSP primers. The PCR condition was as follows: 94°C for 5 minutes, followed by 40 cycles of 94°C for 30 s, annealing temperature (Table S1) for 30 s, 72°C for 60 s, and finally 72°C for 5 min. The amplified DNA fragments were run on 2% agarose gels and stained with ethidium bromide. BSP products were purified by a DNA purification kit (Takara, Dalian) and

inserted into pGEM-T easy vector (Promega). Five clones for every cell line were randomly selected and sequenced. The methylated sequence of *OCTN2* was checked for alignment using Meth-BLAST.

#### Plasmid Construction and *in vitro* Methylation Assay

According to the predicted CpG islands in the genomic sequence, we divided the promoter into three regions. Three regions containing different CpG islands were amplified (Primers listed in Table S2) and inserted into the pGL4.17 vector (Promega). These recombinants, pGL4.17-Region1, Region2 and Region3 were verified by automated sequencing. The respective plasmid was linearized by *Xho* I and subjected to *in*

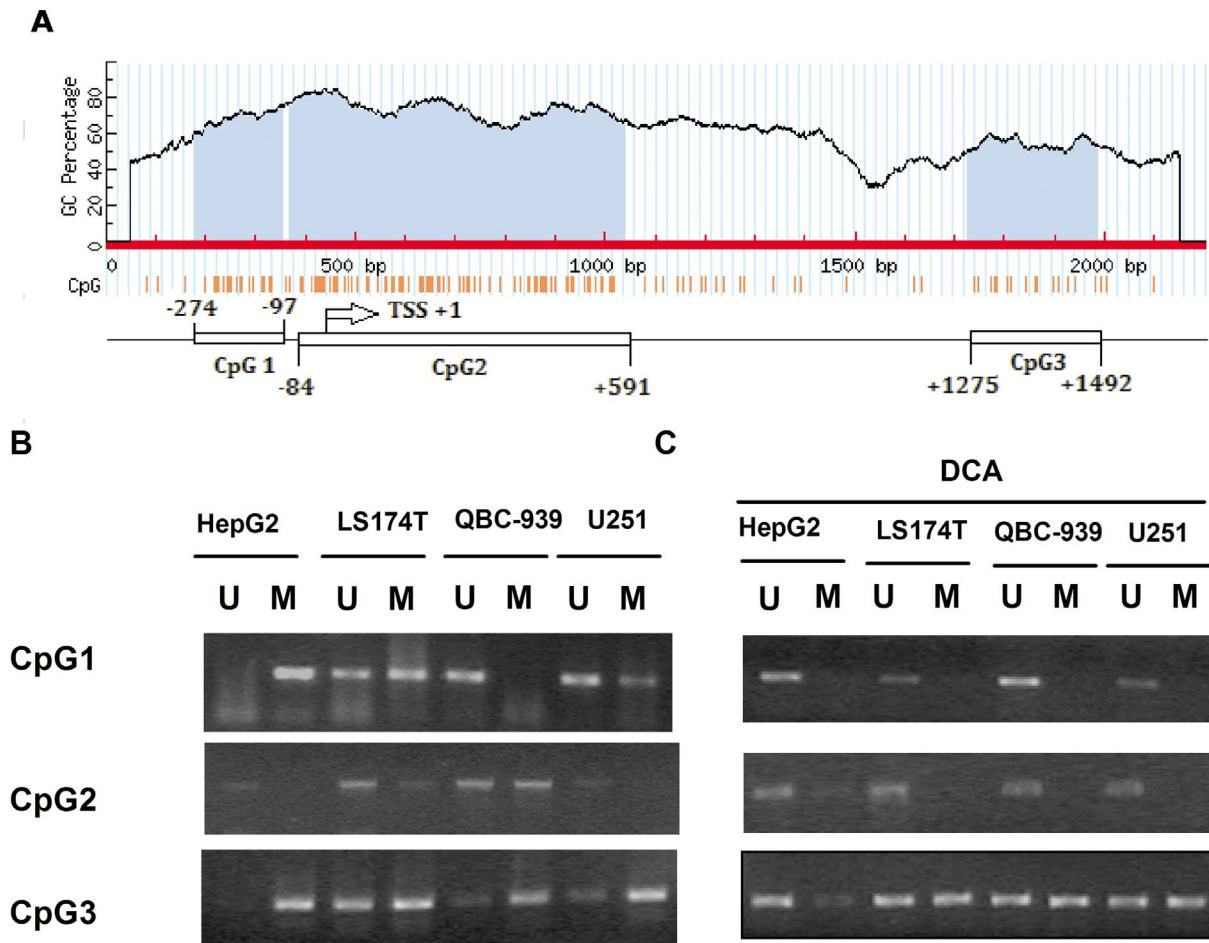

**Figure 3. Methylation status of CpG islands was analyzed by MSP.** (A), computational analysis revealed three putative CpG islands within the OCTN2 genomic sequence by Methyl-primer software as described in *Material and Methods*. (B), MSP analysis for CpG islands of OCTN2 in 1  $\mu$ M DCA treated and non-treated cancer cell lines. MSP was performed with the specific primers to amplify the target CpG islands fractions and run on a 2% agarose gel. All of MSP and BSP analysis were repeated at three times. U: unmethylated sequence; M: methylated sequence. doi:10.1371/journal.pone.0076474.g003

*in vitro* the methylation assay as described in our previous work [21]. The methylation products were then digested by *Kpn* I and inserted into the pGL4.17 vector. These new recombinants containing the methylated promoter regions were named pGL4.17-mRegion 1, pGL4.17-mRegion 2 and pGL4.17-mRegion 3, respectively.

#### Transient Transfection and Luciferase Report Assay

COS-7 cells were seeded in 24-well plates at a density of  $10^5$ /well in 500  $\mu$ l DMEM and 10% FBS. After 8 h, cells were transfected with constructed luciferase vectors (0.2  $\mu$ g/well) using Lipofectamine 2000. The pGL4.17 vector lacking a promoter served as the negative control. Internal control vector pRL-TK (0.02  $\mu$ g/well) was used to normalize luciferase activity. After 8 h, each well of transfected cells was washed twice then 100  $\mu$ l of reporter lysis buffer was added to lyse cells. Each group had triplicate wells and was repeated more than three times. Dual luciferase activity (Relative light units, RLU) was determined by a luminometer.

#### Statistical Analysis

All data were expressed as mean  $\pm$  standard deviation. Statistical analyses were performed with a one-way ANOVA for

significance followed by a post-hoc test using SPSS 13.0 software. Data comparisons with a  $p$  value of less than 0.05 ( $p < 0.05$ ) were considered significantly different.

#### Results

##### OCTN2 mRNA and Protein Levels in Different Cancer Cell Lines

Total cellular RNA and protein were extracted from cancer cell lines and OCTN2 expression was measured by Quantitative RT-PCR and Western blotting, respectively. The highest expression of OCTN2 was in QBC-939, followed by U251, LS174T and HepG2 cells (Fig. 1). The expressions of OCTN2 in QBC-939 and U251 cells were significantly higher than that in U251, LS174T cells ( $p < 0.05$ ).

##### Effects of DCA on the Expression of OCTN2 in Cancer Cell Lines

To examine whether the discrepant expressions of OCTN2 in different cancer cell lines was due to promoter methylation, we treated cancer cell lines with DCA and determined the restored expression of OCTN2. In Fig. 2, DCA remarkably up-regulated the relative OCTN2 mRNA and protein expression in HepG2

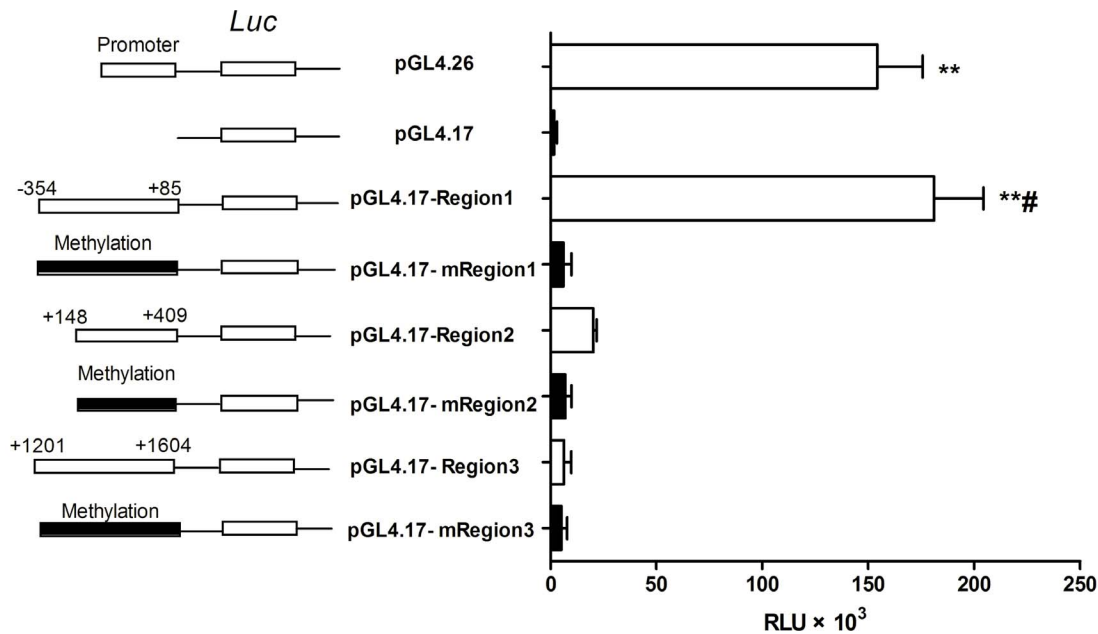

**Figure 4. Methylation effects on transcriptional activity of the OCTN2 promoter in a luciferase reporter assay.** Constructed pGL4.17 luciferase vector containing unmethylated and methylated promoter regions were transfected into COS-7 cells with the pRL-TK control vector. Forty-eight h later, the cells were washed and assayed for luciferase activity. Relative luciferase activity was measured in triplicate wells. Data presented represent the mean  $\pm$  S.D. of three independent experiments. Significant difference from the treatment group of pGL4.17 is denoted with asterisks (\*,  $p < 0.05$ ; \*\*,  $p < 0.01$ ). Significant difference from the group of methylated region in the same region is denoted with a pound sign (#,  $p < 0.05$ ). doi:10.1371/journal.pone.0076474.g004

cells with 0.5  $\mu$ M (1.38-fold, 1.61-fold) and 1  $\mu$ M treatment (1.52-fold, 2.07-fold) ( $p < 0.05$ ), compared to the control group. Similarly, treatment of DCA lead to an increase of OCTN2 levels in LS174T cells. However, DCA did not change the expression of OCTN2 in QBC-939 and U251 cells, which already had high OCTN2 expression levels.

#### OCTN2 Genomic Sequence Harbors Three CpG Islands

We searched the *OCTN2* genomic sequence for the location of CpG dinucleotides using Methy-primer software. CpG dinucleotides were found extensively located near the TSS (Fig. 3A). According to the location intensity of CpG dinucleotides, we observed three putative CpG islands located in the *OCTN2* genomic sequence. CpG island-2 is located close to UTR and exon 1, CpG island-3 is located in intron 1, and CpG island-1 is located upstream of the TSS (Fig. 3A).

#### Methylation Status of CpG Islands within OCTN2 by MSP

To further elucidate the methylation status of CpG islands within *OCTN2* in different cancer cell lines, we analyzed three CpG islands by MSP which distinguishes methylated DNA from un-methylated DNA. In Fig. 3B, CpG island-1 (CpG1) was completely methylated in HepG2 cells, partially methylated in LS174T and U251 cells, and un-methylated in QBC-939 cells. Partially methylated products of CpG island-2 (CpG2) were found in LS174T and QBC-939 cells, but these were un-methylated in HepG2 and U251 cells. In almost all cell lines, CpG island-3 had more methylated products than unmethylated. In Fig. 3C, after treatment with DCA, un-methylated products of CpG1 were increased in HepG2, LS174T and U251 cells. This finding indicates that DCA can cause de-methylation within CpG1. A similar result was observed within CpG2. DCA treatment increased un-methylated products of CpG3 in HepG2 cells, but did not cause significant changes in other cells.

#### Effect of Methylated and Un-methylated Promoter Regions on Transcription Activity of OCTN2 using an *in vitro* Luciferase Reporter Assay

To determine which methylated CpG islands play essential roles in down-regulation of OCTN2, we constructed luciferase reporter plasmids bearing either un-methylated or methylated regions (Fig. 4). Constructed plasmids were transfected into COS-7 cells and used to assess transcriptional activity. In comparison with pGL4.17 (Control), pGL4.17-Region1 displayed markedly increased luciferase activity of 102.5-fold ( $p < 0.01$ ), while luciferase activity from pGL4.17-Region2 and Region3 were only increased 11.4-fold and 3.5-fold ( $p > 0.05$ ). This result indicates that Region1 spanning -354 to +85 bp plays an essential role in promoter activity. Interestingly, only the luciferase activity of un-methylated Region-1 was higher than its methylated vector (29.7-fold,  $p < 0.01$ ). Un-methylated Regions-2 and -3 did not show significant differences in luciferase activity compared to their corresponding methylated regions. It is possible that the methylation statuses of Region-2 and -3 containing CpG island-2 and -3, respectively, are irrelevant to *OCTN2* expression. Thus, these findings demonstrate that increased methylation can inhibit promoter activity of Region-1.

#### Determination of DNA Methylation Profiles of OCTN2 by BSP

For assessing the methylation profile of CpG sites in Region-1, bisulfite genomic sequencing in various cancer cell lines was carried out. In Fig. 5A, the genomic sequence of *OCTN2* promoter was displayed and CpG sites were marked. One methylated sequence of *OCTN2* spanning -325 to -92 bp in HepG2 cells was checked for alignment using MethBLAST and is presented in Fig. 5B. Other methylated sequences from LS174T, QBC-939 and U251 cells are presented in Fig S1, S2 and S3. In

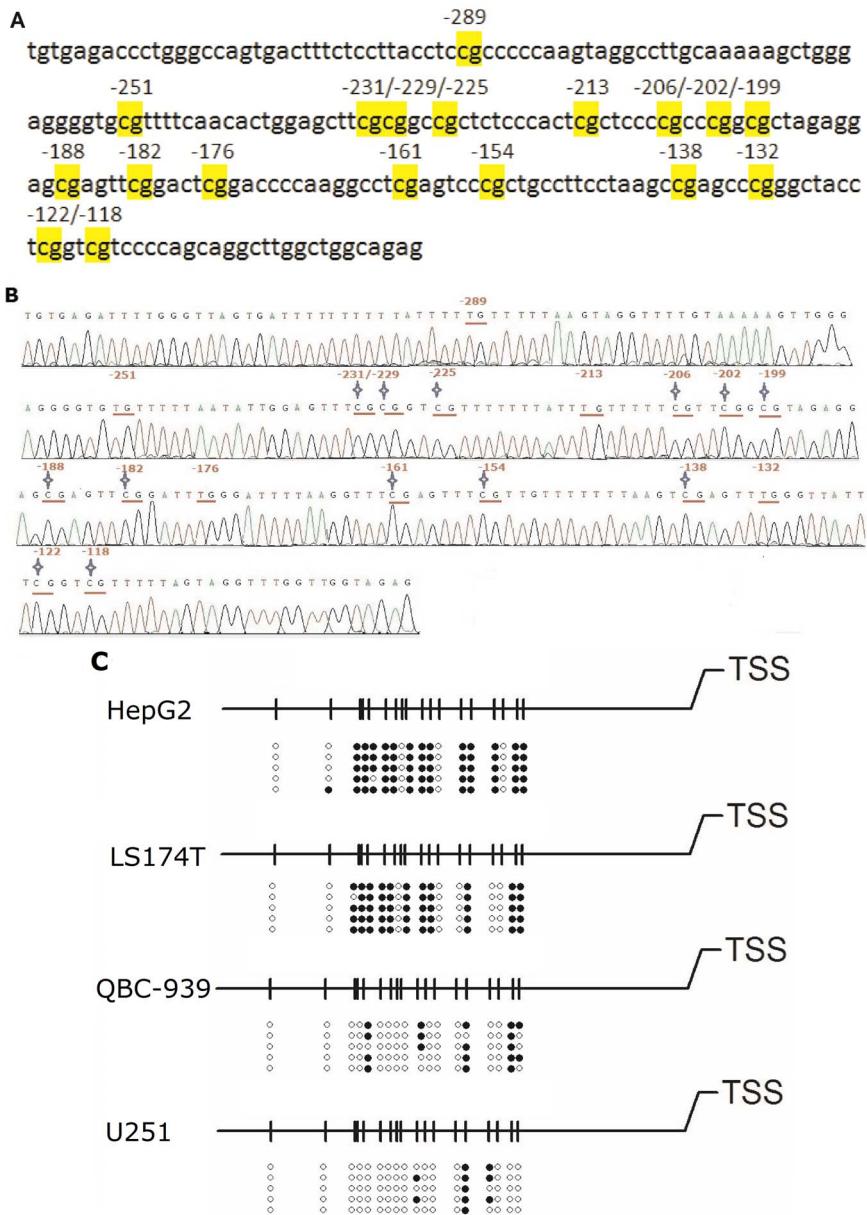

**Figure 5. Methylation profiles around the transcriptional start site of *OCTN2*.** (A), the genomic sequence spanning -325 to -92 bp in promoter Region-1 of *OCTN2*. Eighteen CpG sites were located and marked. (B), bisulfite genomic sequencing analysis of Region-1 of *OCTN2* in HepG2 cells. Bisulfite modified DNA was amplified by BSP as described under *Materials and methods* and then sequenced. Pointed star represents methylated CpG sites. (C), DNA methylation profiles of individual methylated CpG dinucleotides in four cancer cell lines. After BSP, five clones were randomly selected and sequenced. The methylated sequences were checked for alignment using MethBLAST. The open and closed circles represent unmethylated or methylated cytosines, respectively. doi:10.1371/journal.pone.0076474.g005

Fig. 5C, the methylation profiles showed that the rates of methylated CpG sites (mCpG/total CpG number) were 72.2% and 60.0% in HepG2 and LS174T cells, respectively, which is much higher than methylation rates measured in QBC-939 (20.0%) and U251 (11.1%) cells. Moreover, after 1 μM DCA treatment in HepG2, the rates of methylated CpG sites decreased to 13.3% (Fig. 6). Since the hypermethylated CpG sites within OCTN2 are rescued by DCA treatment in HepG2 and LS174T cells, these findings provide direct evidence that individual methylated CpG sites in the promoter may precisely regulate the expression of OCTN2.

**Effects of DCA on Enhancing Sensitivity of Cancer Cells to Oxaliplatin**

To further understand if methylation status of the *OCTN2* gene affects the sensitivity of cancer cells to oxaliplatin, cancer cells were pre-treated with DCA followed by exposure to oxaliplatin. Cell viability was assessed and the IC<sub>50</sub> values were calculated. In Fig 7. A, when cells were exposed to oxaliplatin at 3, 10, 33 and 100 μM, cell viability of DCA-treated HepG2 and LS174T was decreased compared to DMSO-treated cells (p<0.05), but did not change in U251 and QBC-939 cells. In Fig. 7B, the IC<sub>50</sub> values for DCA-treated HepG2 and LS174T cells were decreased to 51.6% and 44.8% (p<0.05), respectively, compared to DMSO-treated cells,

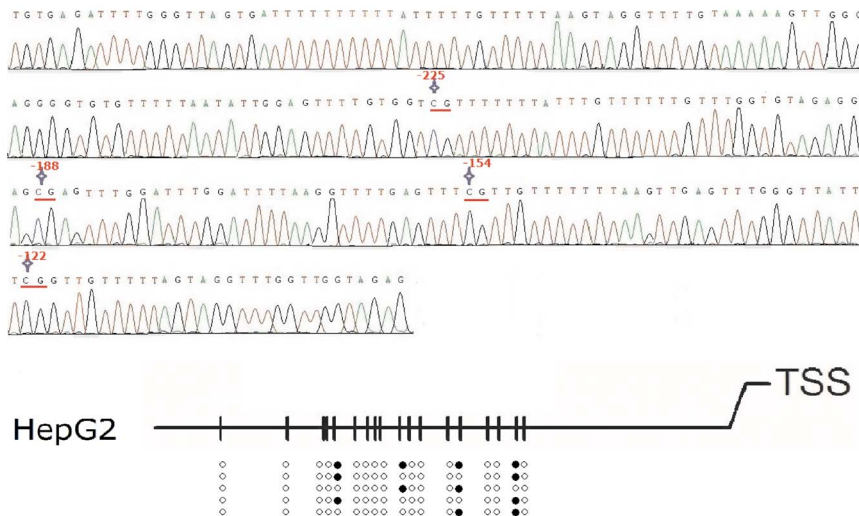

**Figure 6. Methylation profiles of *OCTN2* in DCA-treated HepG2 cells.** (A), bisulfite genomic sequencing analysis of DCA-treated HepG2 cells. After the treatment of DCA, DNA was extracted and subjected to bisulfite modification. Bisulfite modified DNA was amplified by BSP as described under *Materials and methods* and then sequenced. Pointed star represents methylated CpG sites. (B), DNA methylation profiles of individual methylated CpG dinucleotides in DCA-treated HepG2 cells. After BSP, five clones were randomly selected and sequenced. The methylated sequences were checked for alignment using MethBLAST. The open and closed circles represent unmethylated or methylated cytosines, respectively. doi:10.1371/journal.pone.0076474.g006

but were unchanged in QBC-939 and U251 cells. Therefore, it is possible that DCA sensitizes HepG2 and LS174T cells to oxaliplatin through increasing *OCTN2* expression and enhancing the uptake of oxaliplatin.

## Discussion

In this study, we found that hypermethylation within the *OCTN2* promoter is responsible for the down-regulation of *OCTN2* in HepG2 and LS174T cells. We precisely detected the degree of methylation of individual methylated CpG sites in the promoter region by MSP and BSP, which was inversely correlated with the expression of *OCTN2* in different cancer cells. Moreover, DCA pre-treatment of HepG2 and LS174T cells increased oxaliplatin-induced cell death via *OCTN2* demethylation.

The essential role of DNA methylation has attracted much interest as a possible mechanism underlying the aberrant expression of oncogenes, tumor suppressor genes and DNA repair genes in carcinoma cells. Recent findings show a role for DNA methylation in regulating the expression of transporters, such as SLC22A1, A2, A3 (*OCT1*, *OCT2*, *OCT3*), SLC22A18, SLC5A8, Ntcp, Oatp1b2, Bsep, ABCG2, ABCG5/G8 [22–27]. To understand the mechanism by which *OCTN2* expression is repressed in HepG2 and LS174T cells, we treated these cell lines with the demethylating reagent DCA and observed an increase in *OCTN2* mRNA and protein levels in HepG2 and LS174T cells, while no change occurred in QBC-939 and U251 cells. A recent study also found that the low levels of *OCTN2* were increased by DCA in human papillomavirus16 E6- and E7- expressing keratinocytes [17]. DCA inhibits DNA methyltransferase enzymes (DNMTs) and further corrupts the integrity of the methylation imprint, thereby leading to the disruption of epigenetic signatures and regulation of gene expression [28]. Thus, these findings suggest that the down regulation of *OCTN2* in HepG2 and LS174T cells may be due to aberrant promoter methylation.

Analyzing the three putative CpG islands within *OCTN2*, we observed that CpG islands displayed different methylation statuses in different cancer cells, and that hypermethylation

could be reduced by DCA. Therefore, we sought to identify which CpG island plays a pivotal role in the regulation of *OCTN2* expression. In the luciferase reporter assay, only the promoter Region-1 spanning –354 to +85 bp showed increased promoter activity. Moreover, methylation of Region-1 that mimics the methylation patterns in cells, completely inhibited the promoter activity. This result provides the evidence that Region-1 is a possible determinant of *OCTN2* expression, because hypermethylation of Region-1 inhibited transcriptional activity of *OCTN2* in LS174T and HepG2 cells.

Bisulfite genomic sequencing precisely detected the individual methylated CpG sites within promoter Region-1, which was significantly hypermethylated in HepG2 and LS174T compared to QBC-939 and U251 cells. The degree of DNA methylation was inversely correlated with the expression of *OCTN2* in these cancer cells. These findings may reasonably explain the lower levels of *OCTN2* in HepG2 and LS174T cells, compared to the expression in QBC-939 and U251 cells. Moreover, DCA reversed the methylation of CpG sites in Region-1 in HepG2 cells consistent with the increase in *OCTN2* expression.

Methylated CpG dinucleotides within promoter Region-1 inhibit the expression of *OCTN2* probably through two mechanisms. First, many transcription factor bindings may be blocked by methylated CpG dinucleotides within the *OCTN2* promoter. We analyzed promoter Region-1 of *OCTN2* by TFSEARCH software (<http://www.cbrc.jp/research/db/TFSEARCH.html>), and found that the consensus binding sites of transcription factor specificity protein 1 (Sp1) and myeloid zinc finger 1 (MZF-1) overlapped some key CpG sites (Fig S4). Further work is in progress to investigate whether the methylation of specific CpG sites blocks these transcription factors. A second possible mechanism is the aberrant regulation of DNA methyltransferase enzymes and methylation-dependent recruitment of nucleoprotein factors such as the methyl-CpG binding protein MeCP1 and MeCP2 [29–31]. We will investigate how the hypermethylated CpG sites of *OCTN2* recruit these methylation-related proteins and repress the expression of *OCTN2*.

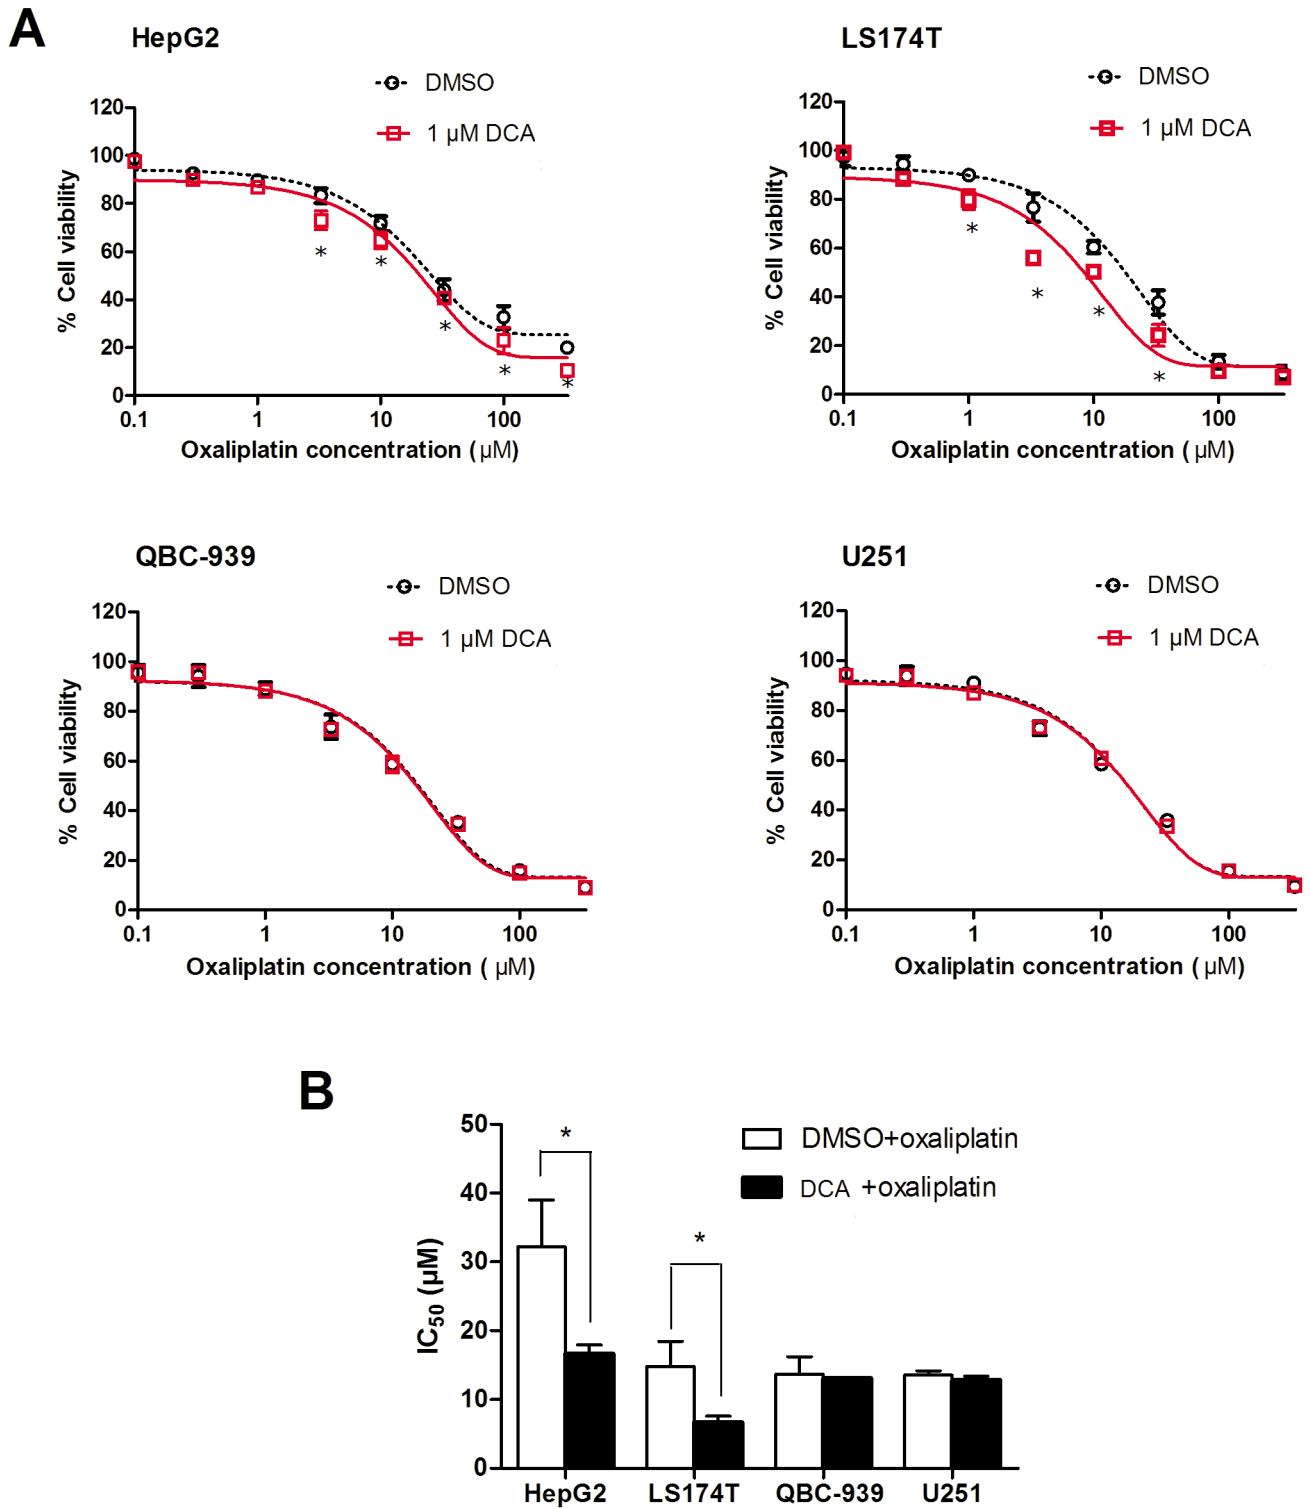

**Figure 7. Demethylation of OCTN2 by DCA influenced cell viability to oxaliplatin.** Cancer cells were pre-treated with 1 µM DCA for 1 week, seeded in 96-well plates at  $1 \times 10^4$  cells/well in 100 µl DMEM and 10% FBS. After 8 h, the cells were exposed to oxaliplatin at various concentrations (0.1, 0.3, 1.0, 3.3, 10, 33, 100 or 330 µM) for 48 h in fresh culture medium. Cell viability was determined by a MTS cell proliferating assay kit. Each concentration was determined in three wells. Data presented represent the mean  $\pm$  S.D. of three independent experiments. (A), the cell viability at each concentration was displayed. Significant differences from DMSO treatment are denoted with an asterisk (\*,  $p < 0.05$ ). (B), IC<sub>50</sub> values were calculated by SPSS 13.0 software. Data presented represent the mean  $\pm$  S.D. of three independent experiments. Significant differences from non-treated cells are denoted with an asterisk (\*,  $p < 0.05$ ). doi:10.1371/journal.pone.0076474.g007



Given the essential role of OCTN2 in cancer cell uptake and thus treatment efficacy of oxaliplatin, methylation of *OCTN2* might be used as a target for enhancing therapeutic efficacy. After treatment with 1  $\mu$ M DCA, HepG2 and LS174T cells became more sensitive to oxaliplatin, but not QBC-939 and U251 cells. Moreover, in DCA treated cells, the increased expression of OCTN2 conferred greater oxaliplatin uptake and more cytotoxicity than non-DCA treated cells. Although DCA in high concentrations causes global genomic instability and cytotoxicity, DCA in low concentrations acts mainly to inhibit DNMT rather than to induce cell death [32]. Thus, DCA was concomitantly administered with oxaliplatin, and the resulting restoration of OCTN2 expression enhanced the uptake and efficacy of oxaliplatin.

## Conclusion

In conclusion, we revealed the epigenetic mechanism of the down-regulation of *OCTN2* in different cancer cells. The promoter region spanning  $-354$  to  $+85$  was a determinant of OCTN2 expression. The degree of methylated CpG sites within the region was inversely correlated with the levels of OCTN2 in cancer cells. Application of the demethylating agent, DCA, reversed the hypermethylation status of the *OCTN2* promoter and increased OCTN2 expression, thereby leading to enhanced uptake of oxaliplatin-causing cancer cells to be more sensitive to oxaliplatin. Given the essential role of OCTN2 in cancer cell uptake and thus treatment efficacy of several chemotherapeutics, the pretreatment of a demethylating reagent is a possible strategy for optimization of pharmacotherapy against cancers.

## Supporting Information

**Figure S1** Methylation profiles around the transcriptional start site of *OCTN2* in LS174T cells. DNA was extracted and subjected to bisulfite modification. Bisulfite modified DNA was amplified by BSP and sequenced as described under *Materials and methods*. Pointed star represents methylated CpG sites. (TIF)

## References

- Wu X, Prasad PD, Leibach FH, Ganapathy V (1998) cDNA sequence, transport function, and genomic organization of human OCTN2, a new member of the organic cation transporter family. *Biochem Biophys Res Commun* 246: 589–595.
- Shoji Y, Koizumi A, Kayo T, Ohata T, Takahashi T, et al. (1998) Evidence for linkage of human primary systemic carnitine deficiency with D5S436: a novel gene locus on chromosome 5q. *Am J Hum Genet* 63: 101–108.
- Tamai I, Ohashi R, Nezu J, Yabuuchi H, Oku A, et al. (1998) Molecular and functional identification of sodium ion-dependent, high affinity human carnitine transporter OCTN2. *J Biol Chem* 273: 20378–20382.
- Yamazaki K, Takazoe M, Tanaka T, Ichimori T, Saito S, et al. (2004) Association analysis of SLC22A4, SLC22A5 and DLG5 in Japanese patients with Crohn disease. *J Hum Genet* 49: 664–668.
- Fisher SA, Hampe J, Onnie CM, Daly MJ, Curley C, et al. (2006) Direct or indirect association in a complex disease: the role of SLC22A4 and SLC22A5 functional variants in Crohn disease. *Hum Mutat* 27: 778–785.
- Tang NL, Hwu WL, Chan RT, Law LK, Fung LM, et al. (2002) A founder mutation (R254X) of SLC22A5 (OCTN2) in Chinese primary carnitine deficiency patients. *Hum Mutat* 20: 232.
- Yoon YA, Lee DH, Ki CS, Lee SY, Kim JW, et al. (2012) SLC22A5 Mutations in a Patient with Systemic Primary Carnitine Deficiency: The First Korean Case Confirmed by Biochemical and Molecular Investigation. *Ann Clin Lab Sci* 42: 424–428.
- Moffatt MF, Gut IG, Demenais F, Strachan DP, Bouzigon E, et al. (2010) A large-scale, consortium-based genomewide association study of asthma. *N Engl J Med* 363: 1211–1221.
- Grigat S, Fork C, Bach M, Golz S, Geerts A, et al. (2009) The carnitine transporter SLC22A5 is not a general drug transporter, but it efficiently translocates mildronate. *Drug Metab Dispos* 37: 330–337.
- Kato S, Kato Y, Nakamura T, Sugiura T, Kubo Y, et al. (2009) Genetic deficiency of carnitine/organic cation transporter 2 (slc22a5) is associated with altered tissue distribution of its substrate pyrrolamine in mice. *Biopharm Drug Dispos* 30: 495–507.
- Jong NN, Nakanishi T, Liu JJ, Tamai I, McKeage MJ (2011) Oxaliplatin transport mediated by organic cation/carnitine transporters OCTN1 and OCTN2 in overexpressing human embryonic kidney 293 cells and rat dorsal root ganglion neurons. *J Pharmacol Exp Ther* 338: 537–547.
- Angelini S, Pantaleo MA, Ravegnini G, Zenesini C, Cavrini G, et al. (2012) Polymorphisms in OCTN1 and OCTN2 transporters genes are associated with prolonged time to progression in unresectable gastrointestinal stromal tumours treated with imatinib therapy. *Pharmacol Res* 68: 1–6.
- Kano T, Kato Y, Ito K, Ogihara T, Kubo Y, et al. (2009) Carnitine/organic cation transporter OCTN2 (Slc22a5) is responsible for renal secretion of cephaloridine in mice. *Drug Metab Dispos* 37: 1009–1016.
- Ringsels R, Posel S, Hirche F, Eder K (2007) Treatment with pharmacological peroxisome proliferator-activated receptor alpha agonist clofibrate causes upregulation of organic cation transporter 2 in liver and small intestine of rats. *Pharmacol Res* 56: 175–183.
- Koch A, Konig B, Stangl GI, Eder K (2008) PPAR alpha mediates transcriptional upregulation of novel organic cation transporters-2 and -3 and enzymes involved in hepatic carnitine synthesis. *Exp Biol Med (Maywood)* 233: 356–365.
- D'Argenio G, Petillo O, Margarucci S, Torpedine A, Calarco A, et al. (2010) Colon OCTN2 gene expression is up-regulated by peroxisome proliferator-activated receptor gamma in humans and mice and contributes to local and systemic carnitine homeostasis. *J Biol Chem* 285: 27078–27087.
- Scalise M, Galluccio M, Accardi R, Cornet I, Tommasino M, et al. (2012) Human OCTN2 (SLC22A5) is down-regulated in virus- and nonvirus-mediated cancer. *Cell Biochem Funct* 30: 419–425.

**Figure S2** Methylation profiles around the transcriptional start site of *OCTN2* in QBC-939 cells. DNA was extracted and subjected to bisulfite modification. Bisulfite modified DNA was amplified by BSP and sequenced as described under *Materials and methods*. Pointed star represents methylated CpG sites. (TIF)

**Figure S3** Methylation profiles around the transcriptional start site of *OCTN2* in U251 cells. DNA was extracted and subjected to bisulfite modification. Bisulfite modified DNA was amplified by BSP and sequenced as described under *Materials and methods*. Pointed star represents methylated CpG sites. (TIF)

**Figure S4** Transcription factor binding site analysis of the promoter region of *OCTN2* by TFsearch software. To reveal the mechanism by where methylated CpG sites inhibit *OCTN2* transcription, we mapped the putative consensus sequences for the transcription factors. CpG sites are on the red lines. Putative consensus sequences are indicated by dotted lines. (TIF)

**Table S1** Primers for Quantitative RT-PCR, MSP and BSP. (PDF)

**Table S2** Primers for the construction of luciferase reporter vectors. (PDF)

## Acknowledgments

We are grateful to Dr. Jie Liu and Dr. Helen Renaud, who provided language help.

## Author Contributions

Conceived and designed the experiments: QQ HHZ. Performed the experiments: QQ JQ YWZ XYL MZ. Analyzed the data: QQ LXW. Contributed reagents/materials/analysis tools: QQ LJF. Wrote the paper: QQ HHZ.

18. Sheikhejad G, Brank A, Christman JK, Goddard A, Alvarez E, et al. (1999) Mechanism of inhibition of DNA (cytosine C5)-methyltransferases by oligodeoxyribonucleotides containing 5,6-dihydro-5-azacytosine. *J Mol Biol* 285: 2021–2034.
19. Livak KJ, Schmittgen TD (2001) Analysis of relative gene expression data using real-time quantitative PCR and the 2<sup>-ΔΔC<sub>T</sub></sup> Method. *Methods* 25: 402–408.
20. Herman JG, Graff JR, Myohanen S, Nelkin BD, Baylin SB (1996) Methylation-specific PCR: a novel PCR assay for methylation status of CpG islands. *Proc Natl Acad Sci U S A* 93: 9821–9826.
21. Luo SQ, Hu JP, Qu Q, Li J, Ren W, et al. (2012) The effects of promoter methylation on downregulation of DAZAP2 in multiple myeloma cell lines. *PLoS One* 7: e40475.
22. Aoki M, Terada T, Kajiwara M, Ogasawara K, Ikai I, et al. (2008) Kidney-specific expression of human organic cation transporter 2 (OCT2/SLC22A2) is regulated by DNA methylation. *Am J Physiol Renal Physiol* 295: F165–F170.
23. Imai S, Kikuchi R, Kusuhara H, Yagi S, Shiota K, et al. (2009) Analysis of DNA methylation and histone modification profiles of liver-specific transporters. *Mol Pharmacol* 75: 568–576.
24. Brim H, Kumar K, Nazarian J, Hathout Y, Jafarian A, et al. (2011) SLC5A8 gene, a transporter of butyrate: a gut flora metabolite, is frequently methylated in African American colon adenomas. *PLoS One* 6: e20216.
25. Chu SH, Feng DF, Ma YB, Zhang H, Zhu ZA, et al. (2011) Promoter methylation and downregulation of SLC22A18 are associated with the development and progression of human glioma. *J Transl Med* 9: 156.
26. Schaeffeler E, Hellerbrand C, Nies AT, Winter S, Kruck S, et al. (2011) DNA methylation is associated with downregulation of the organic cation transporter OCT1 (SLC22A1) in human hepatocellular carcinoma. *Genome Med* 3: 82.
27. Martin V, Sanchez-Sanchez AM, Herrera F, Gomez-Manzano C, Fueyo J, et al. (2013) Melatonin-induced methylation of the ABCG2/BCRP promoter as a novel mechanism to overcome multidrug resistance in brain tumour stem cells. *Br J Cancer* 108: 2005–2012.
28. Siedlecki P, Garcia BR, Musch T, Brueckner B, Suhai S, et al. (2006) Discovery of two novel, small-molecule inhibitors of DNA methylation. *J Med Chem* 49: 678–683.
29. Meehan RR, Lewis JD, McKay S, Kleiner EL, Bird AP (1989) Identification of a mammalian protein that binds specifically to DNA containing methylated CpGs. *Cell* 58: 499–507.
30. Boyes J, Bird A (1991) DNA methylation inhibits transcription indirectly via a methyl-CpG binding protein. *Cell* 64: 1123–1134.
31. Herman JG, Baylin SB (2003) Gene silencing in cancer in association with promoter hypermethylation. *N Engl J Med* 349: 2042–2054.
32. Kurimoto M, Matsuoka H, Hanaoka N, Uneda S, Murayama T, et al. (2013) Pretreatment of leukemic cells with low-dose decitabine markedly enhances the cytotoxicity of gemtuzumab ozogamicin. *Leukemia* 27: 233–235.
